# Supplementary material for: Theoretical Study on the Electronic Structure and Magnetic Properties Regulation of Janus Structure of M’MCO2 2D MXenes
Source: MDPI journal article supplement (doi:10.3390/nano12030556), 2022-02-06
Supplement: s1 [file s1]

---

Supplementary Materials

## **Theoretical Study on the Electronic Structure and Magnetic Properties Regulation of Janus Structure of M'MCO<sub>2</sub> 2D MXenes**

**Panpan Gao** <sup>1,2</sup>, **Minhui Song** <sup>1,2</sup>, **Xiaoxu Wang** <sup>1,2</sup>, **Qing Liu** <sup>1,2,3</sup>, **Shizhen He** <sup>1,2</sup>, **Ye Su** <sup>1,2,\*</sup> and **Ping Qian** <sup>1,2,\*</sup>

<sup>1</sup> Beijing Advanced Innovation Center for Materials Genome Engineering, University of Science and Technology Beijing, Beijing 100083, China; gaopanpan@ustb.edu.cn (P.G.); mhuisong@163.com (M.S.); wangxx@dp.tech (X.W.); liuqing6903@163.com (Q.L.); hsz0430@163.com (S.H.)

<sup>2</sup> School of Mathematics and Physics, University of Science and Technology Beijing, Beijing 100083, China

<sup>3</sup> Department of Physics, National University of Singapore, Singapore 117551, Singapore

\* Correspondence: suyechina@163.com (Y.S.); qianping@ustb.edu.cn (P.Q.)

## Basic information of lattice parameters after structural optimization

Table S1 the lattice parameters of VCrCO<sub>2</sub>

|           | Initial              | NM                   | FM                   | AFM1                | AFM2                 | AFM3                 |
|-----------|----------------------|----------------------|----------------------|---------------------|----------------------|----------------------|
| Symmetry  | P3m1                 | P3m1                 | P3m1                 | Cm                  | P3m1                 | P3m1                 |
| Group     | (C <sub>3V-1</sub> ) | (C <sub>3V-1</sub> ) | (C <sub>3V-1</sub> ) | (C <sub>s-3</sub> ) | (C <sub>3V-1</sub> ) | (C <sub>3V-1</sub> ) |
| IT Number | 156                  | 156                  | 156                  | 8                   | 156                  | 156                  |
| a/Å       | 2.88                 | 2.85                 | 2.95                 | 2.96                | 5.87                 | 5.88                 |
| b/Å       | 2.88                 | 2.85                 | 2.95                 | 2.96                | 2.95                 | 2.96                 |
| c/Å       | 21.81                | 21.81                | 21.81                | 21.81               | 21.81                | 21.81                |
| $\alpha$  | 90.00°               | 90.00°               | 90.00°               | 90.00°              | 90.00°               | 90.00°               |
| $\beta$   | 90.00°               | 90.00°               | 90.00°               | 90.00°              | 90.00°               | 90.00°               |
| $\gamma$  | 120.00°              | 120.00°              | 120.00°              | 119.73°             | 120.24°              | 120.25°              |

Table S2 the lattice parameters of VMnCO<sub>2</sub>

|           | Initial              | NM                   | FM                  | AFM1                | AFM2                | AFM3                |
|-----------|----------------------|----------------------|---------------------|---------------------|---------------------|---------------------|
| Symmetry  | P3m1                 | P3m1                 | Cm                  | Cm                  | Pc                  | Cm                  |
| Group     | (C <sub>3V-1</sub> ) | (C <sub>3V-1</sub> ) | (C <sub>s-3</sub> ) | (C <sub>s-3</sub> ) | (C <sub>s-2</sub> ) | (C <sub>s-3</sub> ) |
| IT Number | 156                  | 156                  | 8                   | 8                   | 7                   | 8                   |
| a/Å       | 2.89                 | 2.87                 | 2.96                | 3.01                | 5.92                | 5.90                |
| b/Å       | 2.89                 | 2.87                 | 2.96                | 2.97                | 2.96                | 2.99                |
| c/Å       | 21.81                | 21.81                | 21.81               | 21.81               | 21.81               | 21.81               |
| $\alpha$  | 90.00°               | 90.00°               | 90.00°              | 90.00°              | 90.00°              | 90.00°              |
| $\beta$   | 90.00°               | 90.00°               | 90.00°              | 90.00°              | 90.00°              | 90.00°              |
| $\gamma$  | 120.00°              | 120.00°              | 119.41°             | 120.55°             | 120.24°             | 120.40°             |

Table S3 the lattice parameters of CrMnCO<sub>2</sub>

|           | Initial              | NM                   | FM                   | AFM1                 | AFM2                 | AFM3                |
|-----------|----------------------|----------------------|----------------------|----------------------|----------------------|---------------------|
| Symmetry  | P3m1                 | P3m1                 | P3m1                 | P3m1                 | P3m1                 | Cm                  |
| Group     | (C <sub>3v-1</sub> ) | (C <sub>s-3</sub> ) |
| IT Number | 156                  | 156                  | 156                  | 156                  | 156                  | 8                   |
| a/Å       | 2.66                 | 2.66                 | 2.93                 | 2.88                 | 5.76                 | 6.61                |
| b/Å       | 2.66                 | 2.66                 | 2.93                 | 2.88                 | 2.91                 | 3.33                |
| c/Å       | 21.81                | 21.81                | 21.81                | 21.81                | 21.81                | 21.81               |
| $\alpha$  | 90.00°               | 90.00°               | 90.00°               | 90.00°               | 90.00°               | 90.00°              |
| $\beta$   | 90.00°               | 90.00°               | 90.00°               | 90.00°               | 90.00°               | 90.00°              |
| $\gamma$  | 120.00°              | 120.00°              | 120.00°              | 120.00°              | 120.41°              | 120.37°             |

Table S4 the lattice parameters of V<sub>2</sub>CO<sub>2</sub>

|           | Initial              | NM                   | FM                   | AFM1                   | AFM2                 | AFM3                   |
|-----------|----------------------|----------------------|----------------------|------------------------|----------------------|------------------------|
| Symmetry  | P $\bar{3}$ m1       | P $\bar{3}$ m1       | C2/m                 | C2/m (C <sub>2h-</sub> | C2/m                 | P2/c (C <sub>2h-</sub> |
| Group     | (D <sub>3d-3</sub> ) | (D <sub>3d-3</sub> ) | (C <sub>2h-3</sub> ) | 3)                     | (C <sub>2h-3</sub> ) | 4)                     |
| IT Number | 164                  | 164                  | 12                   | 12                     | 12                   | 13                     |
| a/Å       | 2.88                 | 2.88                 | 2.95                 | 3.06                   | 5.98                 | 5.99                   |
| b/Å       | 2.88                 | 2.88                 | 2.95                 | 2.96                   | 2.94                 | 2.95                   |
| c/Å       | 21.81                | 21.81                | 21.81                | 21.81                  | 21.81                | 21.81                  |
| $\alpha$  | 90.00°               | 90.00°               | 90.00°               | 90.00°                 | 90.00°               | 90.00°                 |
| $\beta$   | 90.00°               | 90.00°               | 90.00°               | 90.00°                 | 90.00°               | 90.00°                 |
| $\gamma$  | 120.00°              | 120.00°              | 117.78°              | 121.17°                | 119.47°              | 119.52°                |

Table S5 the lattice parameters of Cr<sub>2</sub>CO<sub>2</sub>

|           | Initial              | NM                   | FM                   | AFM1                 | AFM2                 | AFM3                 |
|-----------|----------------------|----------------------|----------------------|----------------------|----------------------|----------------------|
| Symmetry  | $P\bar{3}m1$         | $P\bar{3}m1$         | $P\bar{3}m1$         | $P\bar{3}m1$         | $P\bar{3}m1$         | C2/m                 |
| Group     | (D <sub>3d-3</sub> ) | (C <sub>2h-3</sub> ) |
| IT Number | 164                  | 164                  | 164                  | 164                  | 164                  | 12                   |
| a/Å       | 2.68                 | 2.68                 | 2.89                 | 2.76                 | 5.64                 | 5.87                 |
| b/Å       | 2.68                 | 2.68                 | 2.89                 | 2.76                 | 2.83                 | 2.88                 |
| c/Å       | 21.81                | 21.81                | 21.81                | 21.81                | 21.81                | 21.81                |
| $\alpha$  | 90.00°               | 90.00°               | 90.00°               | 90.00°               | 90.00°               | 90.00°               |
| $\beta$   | 90.00°               | 90.00°               | 90.00°               | 90.00°               | 90.00°               | 90.00°               |
| $\gamma$  | 120.00°              | 120.00°              | 120.00°              | 120.05°              | 120.08°              | 119.43°              |

Table S6 the lattice parameters of Mn<sub>2</sub>CO<sub>2</sub>

|           | Initial              | NM                   | FM                   | AFM1                 | AFM2                 | AFM3                 |
|-----------|----------------------|----------------------|----------------------|----------------------|----------------------|----------------------|
| Symmetry  | $P\bar{3}m1$         | $P\bar{3}m1$         | $P\bar{3}m1$         | $P\bar{3}m1$         | $P\bar{3}m1$         | $P\bar{3}m1$         |
| Group     | (D <sub>3d-3</sub> ) |
| IT Number | 164                  | 164                  | 164                  | 164                  | 164                  | 164                  |
| a/Å       | 2.87                 | 2.73                 | 2.95                 | 2.97                 | 5.85                 | 5.87                 |
| b/Å       | 2.87                 | 2.73                 | 2.95                 | 2.97                 | 2.97                 | 2.93                 |
| c/Å       | 21.81                | 21.81                | 21.81                | 21.81                | 21.81                | 21.81                |
| $\alpha$  | 90.00°               | 90.00°               | 90.00°               | 90.00°               | 90.00°               | 90.00°               |
| $\beta$   | 90.00°               | 90.00°               | 90.00°               | 90.00°               | 90.00°               | 90.00°               |
| $\gamma$  | 120.00°              | 120.00°              | 120.00°              | 120.00°              | 120.42°              | 119.93°              |

---

## Magnetic moment information

The unit of atomic magnetic moment is  $\mu\text{B}/\text{atom}$ , and the unit of total magnetic moment is  $\mu\text{B}/\text{formula unit}$ .

Table S7 the magnetic moment of  $\text{VCrCO}_2$

|       | FM    | AFM1  | AFM2  | AFM3  |
|-------|-------|-------|-------|-------|
| V     | 0.762 | 0.594 | 0.307 | 0.306 |
| Cr    | 2.801 | 2.786 | 2.785 | 2.786 |
| C     | 0.259 | 0.018 | 0.015 | 0.015 |
| O     | 0.118 | 0.099 | 0.026 | 0.026 |
| total | 3.068 | 2.124 | 0.001 | 0.003 |

Table S8 the magnetic moment of  $\text{VMnCO}_2$

|       | FM    | AFM1  | AFM2  | AFM3  |
|-------|-------|-------|-------|-------|
| V     | 1.039 | 1.192 | 1.145 | 0.933 |
| Mn    | 3.379 | 3.371 | 3.318 | 3.277 |
| C     | 0.223 | 0.099 | 0.025 | 0.048 |
| O     | 0.076 | 0.063 | 0.026 | 0.018 |
| total | 4.042 | 2.059 | 0.000 | 0.000 |

Table S9 the magnetic moment of  $\text{CrMnCO}_2$

|       | FM    | AFM1  | AFM2  | AFM3  |
|-------|-------|-------|-------|-------|
| Cr    | 2.585 | 2.457 | 2.652 | 3.071 |
| Mn    | 3.706 | 3.686 | 3.59  | 4.333 |
| C     | 0.552 | 0.035 | 0.023 | 0.199 |
| O     | 0.264 | 0.141 | 0.071 | 0.049 |
| total | 5.212 | 1.112 | 0.001 | 0.000 |

Table S10 the magnetic moment of  $\text{V}_2\text{CO}_2$

|   | FM    | AFM1  | AFM2  | AFM3  |
|---|-------|-------|-------|-------|
| V | 1.115 | 1.116 | 1.052 | 0.978 |
| C | 0.136 | 0.000 | 0.000 | 0.042 |

---

|       |       |       |       |       |
|-------|-------|-------|-------|-------|
| O     | 0.056 | 0.053 | 0.032 | 0.031 |
| total | 1.982 | 0.000 | 0.000 | 0.000 |

---

Table S11 the magnetic moment of Cr<sub>2</sub>CO<sub>2</sub>

|       | FM    | AFM1  | AFM2  | AFM3  |
|-------|-------|-------|-------|-------|
| Cr    | 2.582 | 2.321 | 2.430 | 2.460 |
| C     | 0.516 | 0.003 | 0.024 | 0.270 |
| O     | 0.232 | 0.104 | 0.077 | 0.077 |
| total | 4.184 | 0.034 | 0.386 | 0.019 |

---

Table S12 the magnetic moment of Mn<sub>2</sub>CO<sub>2</sub>

|       | FM    | AFM1  | AFM2  | AFM3  |
|-------|-------|-------|-------|-------|
| Mn    | 3.332 | 3.413 | 3.385 | 3.146 |
| C     | 0.311 | 0.000 | 0.000 | 0.073 |
| O     | 0.127 | 0.054 | 0.022 | 0.031 |
| total | 6.097 | 0.000 | 0.000 | 0.000 |

---
